# Supplementary material for: A systematic review and meta-analysis of the role of Doppler ultrasonography of the superior mesenteric artery in detecting neonates at risk of necrotizing enterocolitis
Source: Springer Nature journal article supplement (doi:10.1007/s00247-023-05695-6), 2023-06-13

| Study or Subgroup     | NEC   |      |           | Control |     |            | Weight        | Std. Mean Difference<br>IV, Random, 95% CI |
|-----------------------|-------|------|-----------|---------|-----|------------|---------------|--------------------------------------------|
|                       | Mean  | SD   | Total     | Mean    | SD  | Total      |               |                                            |
| Guang et al. [12]     | 8.44  | 4    | 8         | 7.81    | 3   | 96         | 31.2%         | 0.20 [-0.52, 0.92]                         |
| Khodair et al. [18]   | 18.75 | 11.3 | 12        | 14.9    | 5.6 | 40         | 33.5%         | 0.52 [-0.13, 1.18]                         |
| Louis et al. [22]     | -3.3  | 4.4  | 16        | -0.6    | 5.1 | 34         | 35.3%         | -0.54 [-1.15, 0.06]                        |
| <b>Total (95% CI)</b> |       |      | <b>36</b> |         |     | <b>170</b> | <b>100.0%</b> | <b>0.05 [-0.60, 0.70]</b>                  |

Heterogeneity:  $\tau^2=0.22$ ;  $\chi^2=5.86$ ,  $df=2$  ( $P=0.05$ ),  $I^2=66\%$   
 Test for overall effect:  $Z=0.14$  ( $P=0.89$ )

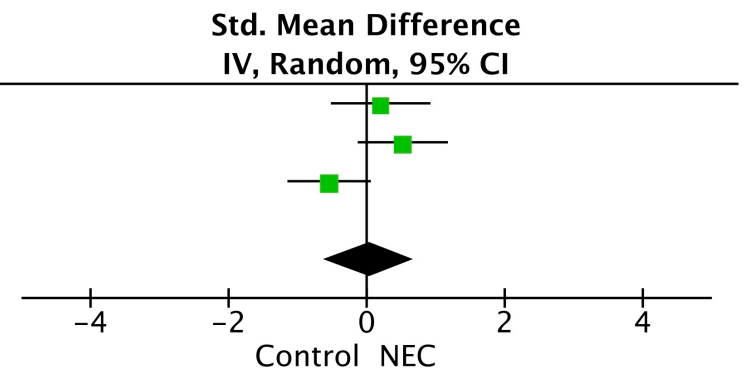

Supplement: MOESM1 [file 25481086]
