# Supplementary material for: A systematic review and meta-analysis of the role of Doppler ultrasonography of the superior mesenteric artery in detecting neonates at risk of necrotizing enterocolitis
Source: Springer Nature journal article supplement (doi:10.1007/s00247-023-05695-6), 2023-06-13

| Study or Subgroup     | NEC   |       |           | Control |       |           | Weight        | Std. Mean Difference<br>IV, Random, 95% CI |
|-----------------------|-------|-------|-----------|---------|-------|-----------|---------------|--------------------------------------------|
|                       | Mean  | SD    | Total     | Mean    | SD    | Total     |               |                                            |
| Deeg et al. [11]      | 119   | 57.7  | 14        | 68.4    | 20.5  | 14        | 31.0%         | 1.13 [0.33, 1.94]                          |
| Hashem et al. [21]    | 47.01 | 27.05 | 25        | 72.72   | 26.54 | 26        | 34.0%         | -0.94 [-1.53, -0.36]                       |
| Urboniene et al. [24] | 34.2  | 10.6  | 29        | 38.4    | 12.2  | 33        | 35.0%         | -0.36 [-0.86, 0.14]                        |
| <b>Total (95% CI)</b> |       |       | <b>68</b> |         |       | <b>73</b> | <b>100.0%</b> | <b>-0.10 [-1.13, 0.94]</b>                 |

Heterogeneity:  $\tau^2=0.74$ ;  $\chi^2=16.92$ ,  $df=2$  ( $P<0.001$ ),  $I^2=88\%$

Test for overall effect:  $Z=0.18$  ( $P=0.86$ )

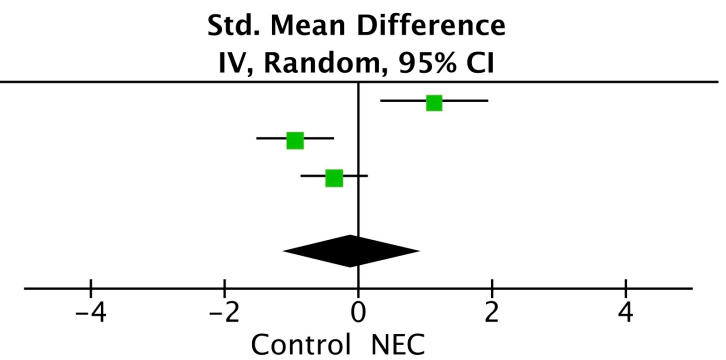

Supplement: MOESM2 [file 25481086]
