# Supplementary material for: A systematic review and meta-analysis of the role of Doppler ultrasonography of the superior mesenteric artery in detecting neonates at risk of necrotizing enterocolitis
Source: Springer Nature journal article supplement (doi:10.1007/s00247-023-05695-6), 2023-06-13

| Study or Subgroup     | NEC   |       |           | Control |       |           | Weight        | Std. Mean Difference<br>IV, Random, 95% CI |
|-----------------------|-------|-------|-----------|---------|-------|-----------|---------------|--------------------------------------------|
|                       | Mean  | SD    | Total     | Mean    | SD    | Total     |               |                                            |
| Deeg et al. [11]      | 10.2  | 8.9   | 14        | 11.8    | 6.8   | 14        | 46.1%         | -0.20 [-0.94, 0.55]                        |
| Hashem et al. [21]    | 20.07 | 14.91 | 25        | 34.86   | 13.49 | 26        | 53.9%         | -1.03 [-1.61, -0.44]                       |
| <b>Total (95% CI)</b> |       |       | <b>39</b> |         |       | <b>40</b> | <b>100.0%</b> | <b>-0.64 [-1.45, 0.17]</b>                 |

Heterogeneity:  $\tau^2=0.23$ ;  $\chi^2=2.95$ ,  $df=1$  ( $P=0.09$ ),  $I^2=66\%$

Test for overall effect:  $Z=1.56$  ( $P=0.12$ )

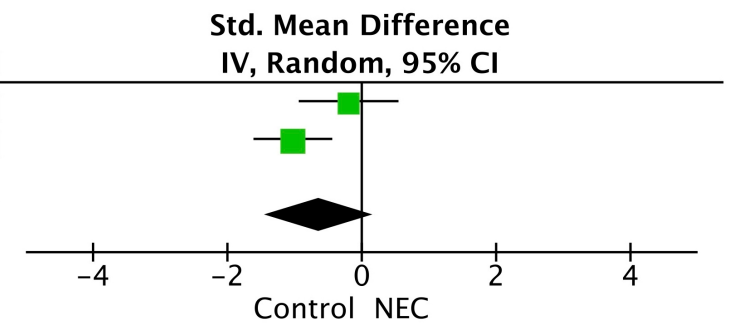

Supplement: MOESM3 [file 25481086]
