# Supplementary material for: A systematic review and meta-analysis of the role of Doppler ultrasonography of the superior mesenteric artery in detecting neonates at risk of necrotizing enterocolitis
Source: Springer Nature journal article supplement (doi:10.1007/s00247-023-05695-6), 2023-06-13

| Study or Subgroup     | NEC  |      |           | Control |     |           | Weight        | Mean Difference<br>IV, Random, 95% CI |
|-----------------------|------|------|-----------|---------|-----|-----------|---------------|---------------------------------------|
|                       | Mean | SD   | Total     | Mean    | SD  | Total     |               |                                       |
| Deeg et al. [11]      | 28   | 13.3 | 14        | 13      | 5.5 | 14        | 32.3%         | 15.00 [7.46, 22.54]                   |
| Kempley et al. [13]   | 36.5 | 15.3 | 19        | 23.9    | 9.3 | 19        | 31.7%         | 12.60 [4.55, 20.65]                   |
| Urboniene et al. [24] | 20.1 | 6.4  | 29        | 21.7    | 6.9 | 33        | 36.0%         | -1.60 [-4.91, 1.71]                   |
| <b>Total (95% CI)</b> |      |      | <b>62</b> |         |     | <b>66</b> | <b>100.0%</b> | <b>8.26 [-3.72, 20.24]</b>            |

Heterogeneity:  $\tau^2=100.93$ ;  $\chi^2=22.49$ ,  $df=2$  ( $P<0.001$ ),  $I^2=91\%$   
 Test for overall effect:  $Z=1.35$  ( $P=0.18$ )

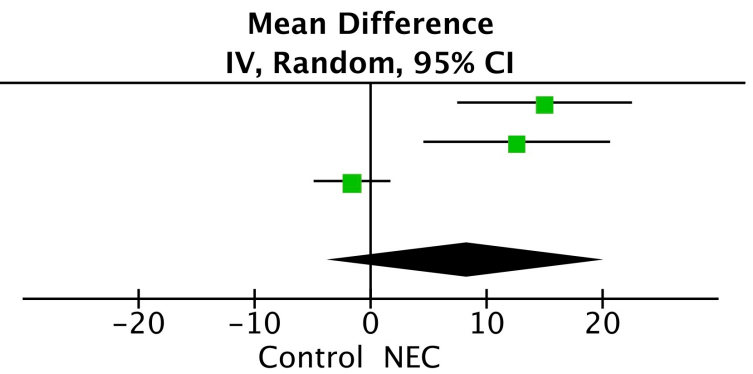

Supplement: MOESM4 [file 25481086]
