# Supplementary material for: A systematic review and meta-analysis of the role of Doppler ultrasonography of the superior mesenteric artery in detecting neonates at risk of necrotizing enterocolitis
Source: Springer Nature journal article supplement (doi:10.1007/s00247-023-05695-6), 2023-06-13

| Study or Subgroup     | NEC   |       |           | Control |      |           | Weight        | Std. Mean Difference |                      |
|-----------------------|-------|-------|-----------|---------|------|-----------|---------------|----------------------|----------------------|
|                       | Mean  | SD    | Total     | Mean    | SD   | Total     |               | IV, Random, 95% CI   | IV, Random, 95% CI   |
| Hashem et al. [21]    | 2.017 | 1.421 | 25        | 1.75    | 0.43 | 26        | 33.8%         | 0.25                 | [-0.30, 0.80]        |
| Kempley et al. [13]   | 2.17  | 0.9   | 19        | 2.72    | 1    | 19        | 32.7%         | -0.57                | [-1.22, 0.08]        |
| Urboniene et al. [24] | 1.66  | 0.41  | 29        | 2.69    | 0.79 | 33        | 33.5%         | -1.59                | [-2.16, -1.01]       |
| <b>Total (95% CI)</b> |       |       | <b>73</b> |         |      | <b>78</b> | <b>100.0%</b> | <b>-0.63</b>         | <b>[-1.72, 0.46]</b> |

Heterogeneity:  $\tau^2=0.84$ ;  $\chi^2=20.44$ ,  $df=2$  ( $P<0.001$ ),  $I^2=90\%$   
 Test for overall effect:  $Z=1.13$  ( $P=0.26$ )

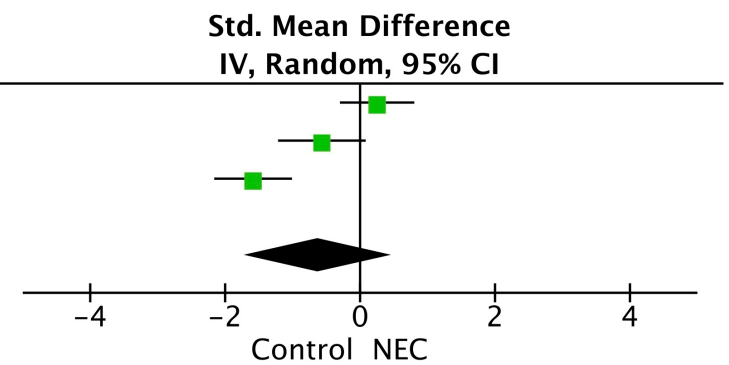

Supplement: MOESM5 [file 25481086]
