# Supplementary material for: A systematic review and meta-analysis of the role of Doppler ultrasonography of the superior mesenteric artery in detecting neonates at risk of necrotizing enterocolitis
Source: Springer Nature journal article supplement (doi:10.1007/s00247-023-05695-6), 2023-06-13

| Study or Subgroup     | NEC  |      |           | Control |       |           | Weight        | Std. Mean Difference |                      |
|-----------------------|------|------|-----------|---------|-------|-----------|---------------|----------------------|----------------------|
|                       | Mean | SD   | Total     | Mean    | SD    | Total     |               | IV, Random, 95% CI   | IV, Random, 95% CI   |
| Deeg et al. [11]      | 0.88 | 0.12 | 14        | 0.84    | 0.08  | 14        | 33.3%         | 0.38                 | [-0.37, 1.13]        |
| Hashem et al. [21]    | 0.81 | 0.14 | 25        | 0.79    | 0.088 | 26        | 33.8%         | 0.17                 | [-0.38, 0.72]        |
| Urboniene et al. [24] | 0.62 | 0.1  | 29        | 0.91    | 0.008 | 33        | 32.9%         | -4.18                | [-5.09, -3.27]       |
| <b>Total (95% CI)</b> |      |      | <b>68</b> |         |       | <b>73</b> | <b>100.0%</b> | <b>-1.19</b>         | <b>[-3.72, 1.34]</b> |

Heterogeneity:  $\tau^2=4.87$ ;  $\chi^2=73.60$ ,  $df=2$  ( $P<0.001$ ),  $I^2=97\%$   
 Test for overall effect:  $Z=0.92$  ( $P=0.36$ )

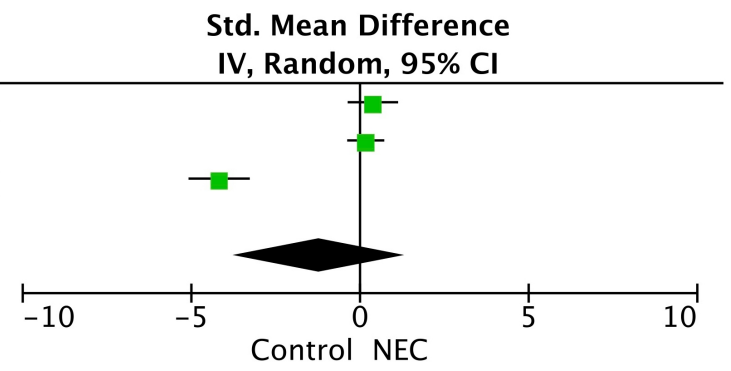

Supplement: MOESM6 [file 25481086]
